# Supplementary material
Source: PubMed Central journal article supplement (PMC4336547)

**A**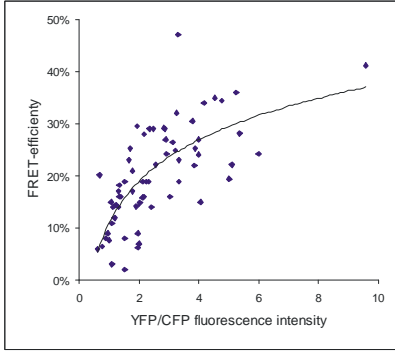**B**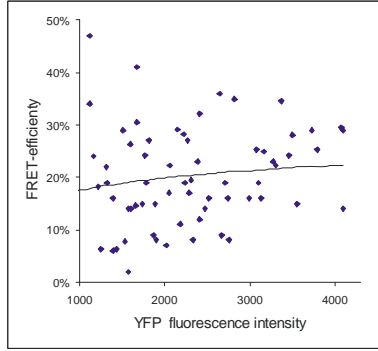**C**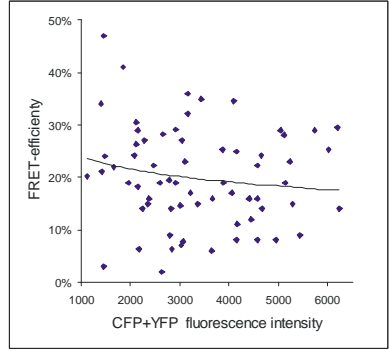**Fig. S1**

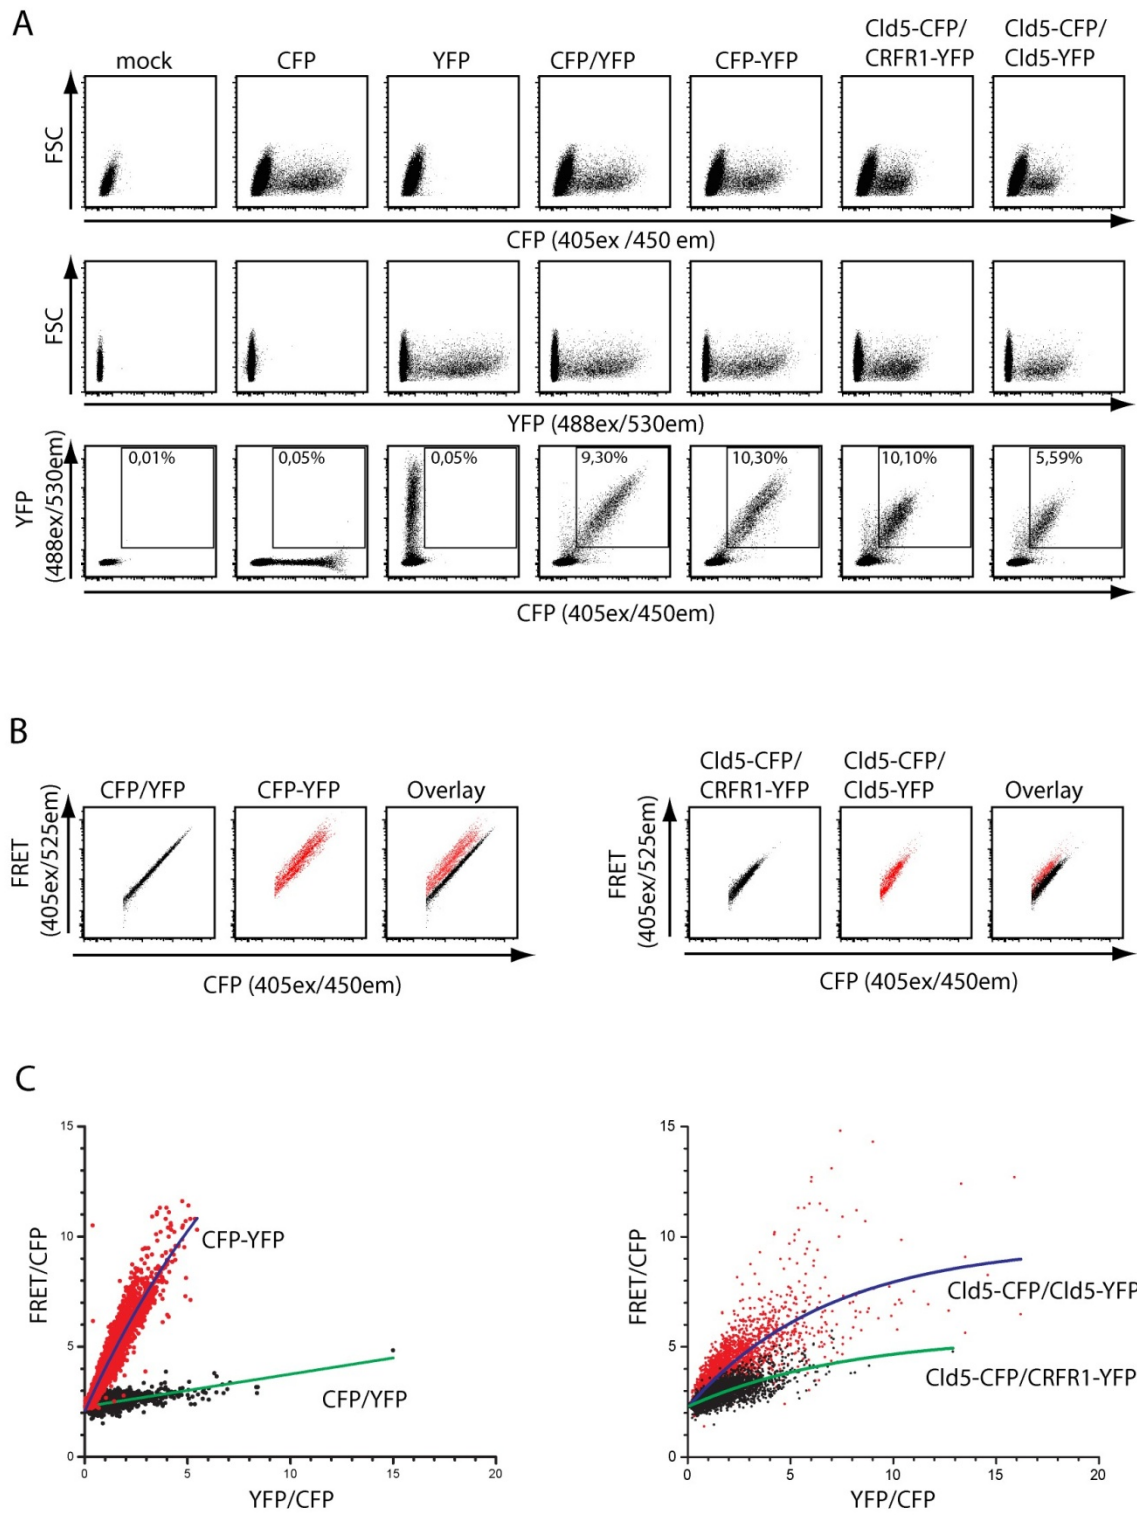

**Fig. S2**

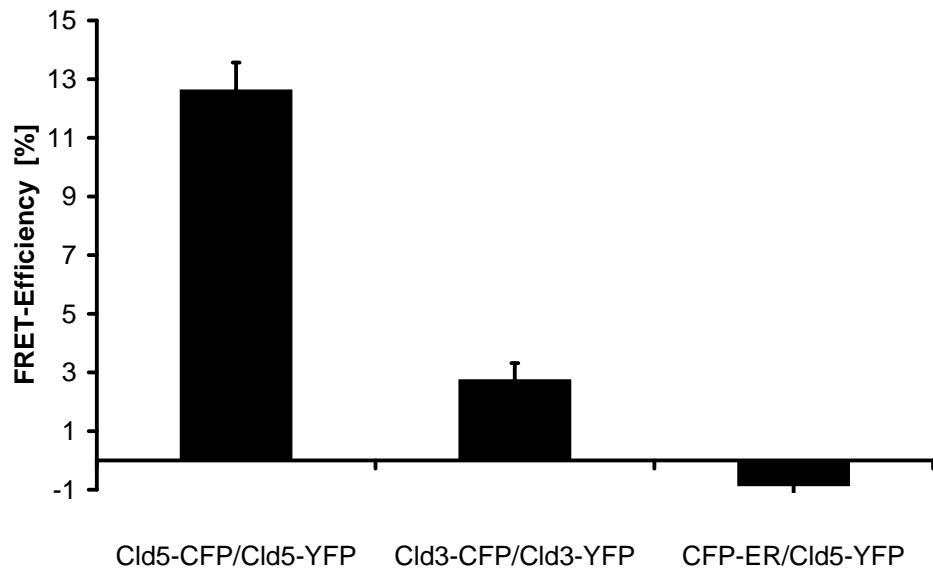

Fig. S3

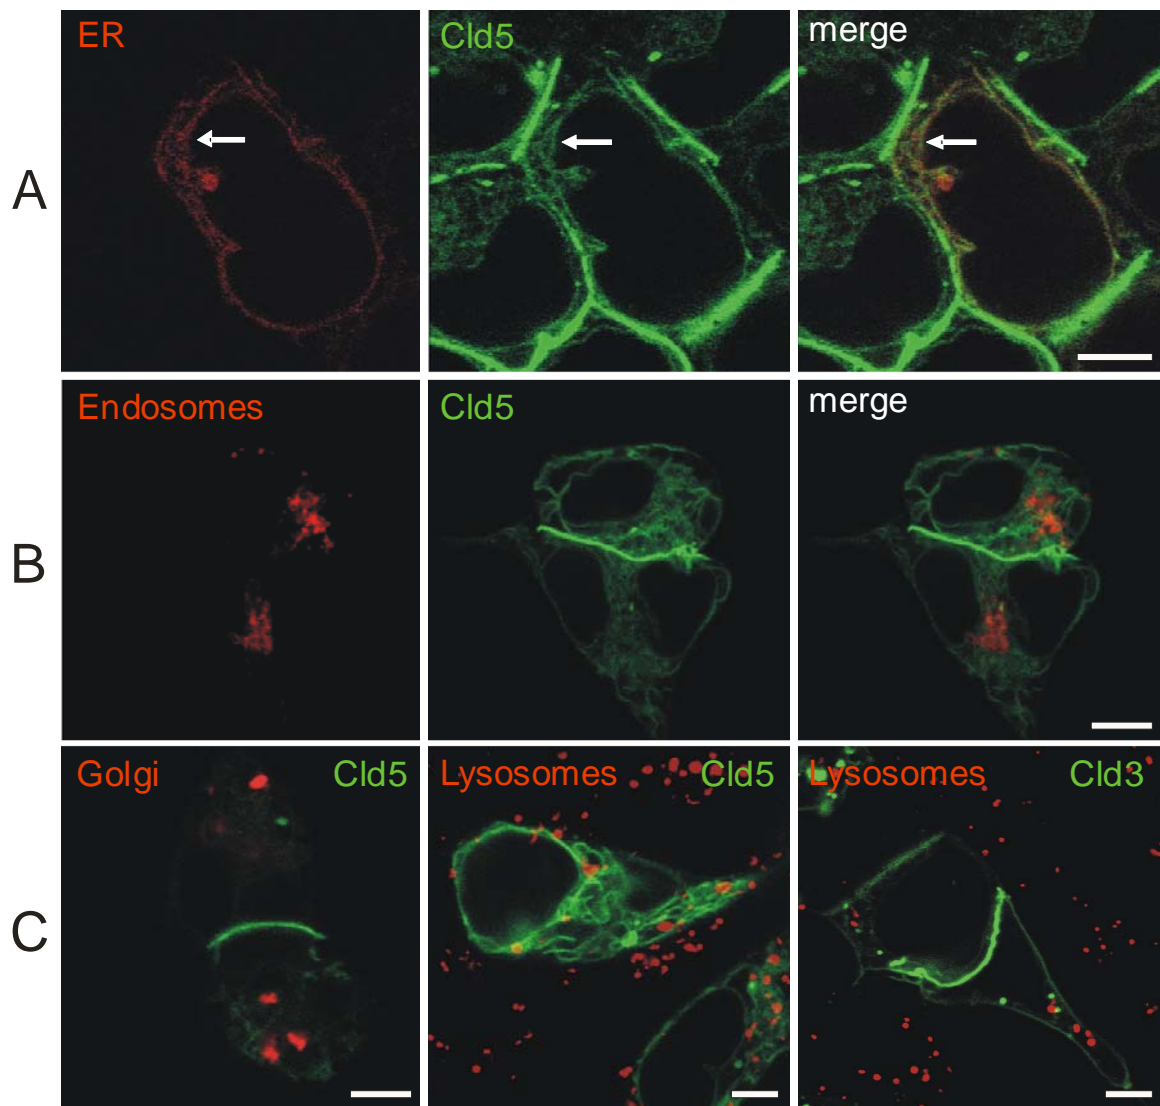

Fig. S4

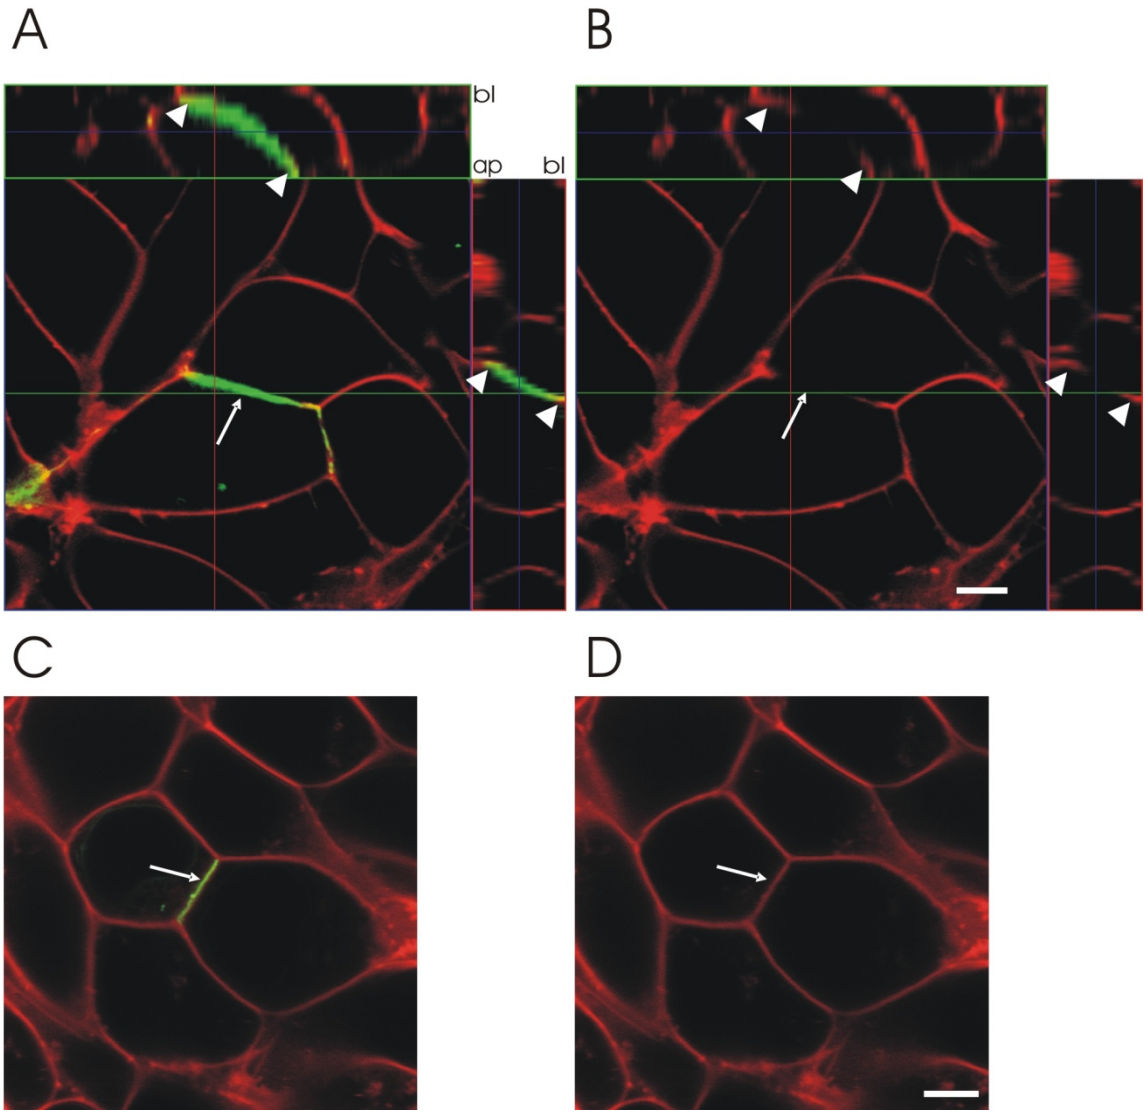

Fig. S5

Supplement: NIHMS661403-supplement-01.pdf [file NIHMS661403-supplement-01.pdf]
